# Supplementary material
Source: PubMed Central journal article supplement (PMC7243909)
Supplement: NIHMS421658-supplement-1_si_001.pdf [file NIHMS421658-supplement-1_si_001.pdf]

## Supporting Information

# ***O*<sup>2</sup>-Functionalized Methylamine Diazeniumdiolates: Evidence for *E* ⇌ *Z* Equilibration in an Acyclic System**

Debanjan Biswas,\* Ryan J. Holland, Jeffrey R. Deschamps, Zhao Cao,  
Larry K. Keefer, and Joseph E. Saavedra\*

*Drug Design Section, Chemical Biology Laboratory, Frederick National Laboratory for Cancer Research, Frederick, MD 21702, USA. Basic Science Program, SAIC-Frederick, Frederick National Laboratory for Cancer Research, Frederick, MD 21702, USA. Center for Biomolecular Science and Engineering, Naval Research Laboratory, Washington, D. C. 20375, USA.*

### **Table of Contents**

|      |                                                                                 |     |
|------|---------------------------------------------------------------------------------|-----|
| I.   | Dynamic NMR experiments                                                         | S2  |
| II.  | UV-visible spectroscopic determination of p <i>K</i> <sub>a</sub> for <b>13</b> | S2  |
| III. | LC/MS analysis                                                                  | S3  |
| IV.  | Single-crystal X-ray diffraction analysis of <b>Z-4</b>                         | S6  |
| V.   | <sup>1</sup> H and <sup>13</sup> C NMR spectra for new compounds                | S8  |
| VI.  | References                                                                      | S20 |

**Dynamic NMR Experiments.** Data used to derive the rate of exchange involving the anion and its conjugate acid were recorded on a 400 MHz NMR spectrometer. Samples were prepared in D<sub>2</sub>O and the pD was adjusted to 3, 7, and 13 using NaOD and/or DCl.

### UV-Visible Spectra for Determination of pK<sub>a</sub> for 13.

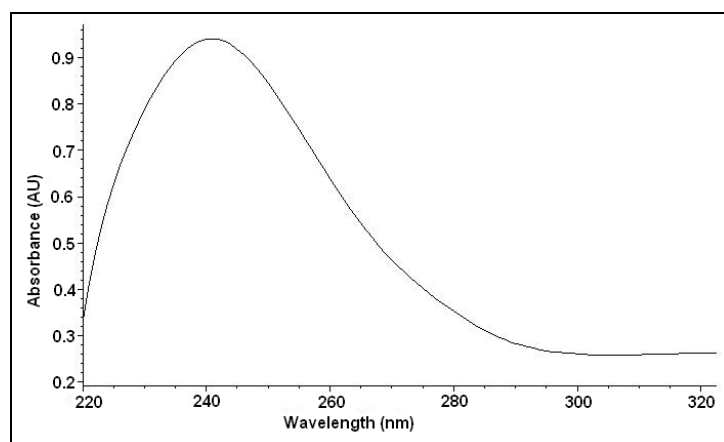

**Figure S1.** UV spectrum of **13** ( $\lambda_{\text{max}} = 241$  nm) in pH 7.4 buffer.

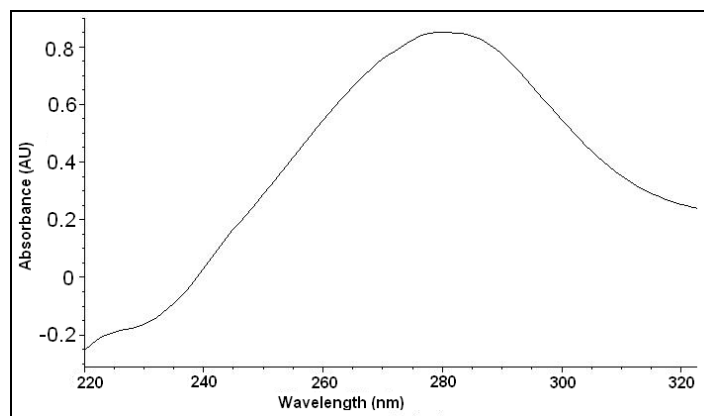

**Figure S2.** UV spectrum of **13** ( $\lambda_{\text{max}} = 278$  nm) in 1 M NaOH solution.

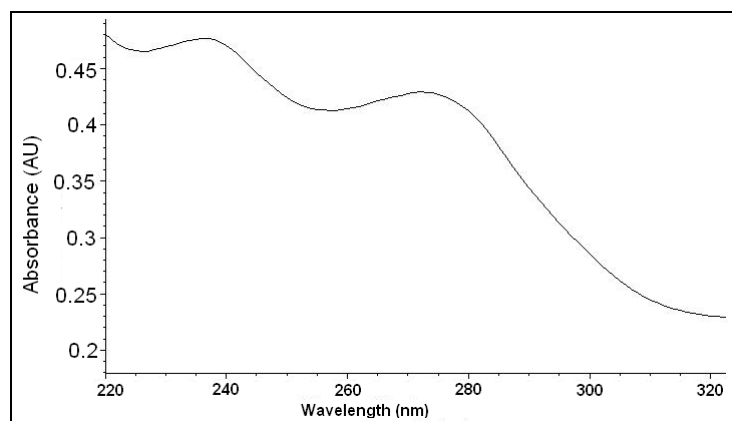

**Figure S3.** UV spectrum of **13** ( $\lambda_{\text{max}} = 241$  and  $278$  nm) in pH 11.7 buffer.

**LC/MS Analysis.** A mixture of the two isomeric forms of **13** was injected on a HPLC, and the separations were performed on a reverse phase C18 column (3  $\mu\text{m}$ , 2.1x150 mm), with a water-acetonitrile 90:10 mobile phase and a flow rate of 0.2 mL/min. The solvent line was split prior to entering the mass spectrometer. High resolution mass spectra (HRMS) were recorded on an Accurate-Mass quadrupole time-of-flight (Q-TOF) mass spectrometer. Positive ions were generated using electrospray ionization (ESI) with a capillary voltage of 3500 V, a fragmenter voltage of 175 V, and a nebulizer pressure of 25 psi.

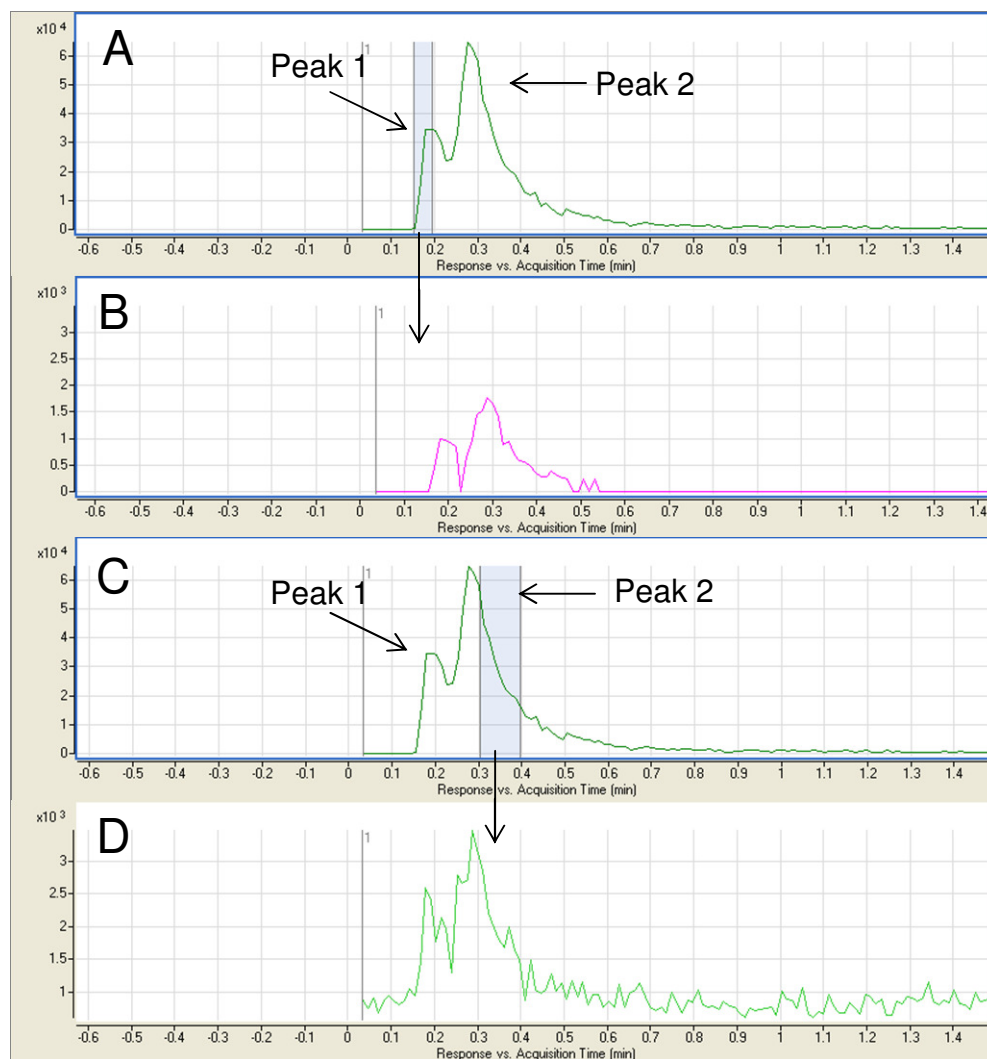

**Figure S4.** Equilibration of compound **13** between two isomeric forms that is partially separable by HPLC. **Panel A** is an HPLC trace illustrating the partial separation, with the shaded area representing the portion of the eluate richest in the smaller component; this portion was collected at 0 °C and immediately reinjected to obtain the chromatogram of **Panel B**, showing re-equilibration. **Panel C**, same as **A** except that the eluate that was collected cold and immediately reinjected (shaded area) was enriched in the major isomer. **D**, as in the experiment of **Panel B**, the resulting HPLC trace showed complete re-equilibration. Each trace is an extracted ion chromatogram,  $m/z$  120.077. Photodiode array detector responses confirm that the two peaks in each chromatogram also had identical ultraviolet spectra ( $\lambda_{\text{max}} = 240$  nm).

## Peak 1

| m/z                                 | Ion                                                         | Formula                                                      | Abundance |           |           |           |               |       |            |             |               |     |
|-------------------------------------|-------------------------------------------------------------|--------------------------------------------------------------|-----------|-----------|-----------|-----------|---------------|-------|------------|-------------|---------------|-----|
| 120.07682                           | (M+H) <sup>+</sup>                                          | C <sub>3</sub> H <sub>10</sub> N <sub>3</sub> O <sub>2</sub> | 24124.2   |           |           |           |               |       |            |             |               |     |
| Best                                | Formula (M)                                                 | Ion Formula                                                  | m/z       | Calc m/z  | Mass      | Calc Mass | Abs Diff (pp) | Score | Mass Match | Abund Match | Spacing Match | DBE |
| <input checked="" type="checkbox"/> | C <sub>3</sub> H <sub>9</sub> N <sub>3</sub> O <sub>2</sub> | C <sub>3</sub> H <sub>10</sub> N <sub>3</sub> O <sub>2</sub> | 120.07682 | 120.07675 | 119.06954 | 119.06948 | 0.57          | 87.58 | 99.94      | 87.77       | 62.65         | 1   |

## Peak 2

| m/z                                 | Ion                                                         | Formula                                                       | Abundance |           |           |           |               |       |            |             |               |     |
|-------------------------------------|-------------------------------------------------------------|---------------------------------------------------------------|-----------|-----------|-----------|-----------|---------------|-------|------------|-------------|---------------|-----|
| 120.07692                           | (M+H) <sup>+</sup>                                          | C <sub>3</sub> H <sub>10</sub> N <sub>3</sub> O <sub>2</sub>  | 62731.2   |           |           |           |               |       |            |             |               |     |
| Best                                | Formula (M)                                                 | Ion Formula                                                   | m/z       | Calc m/z  | Mass      | Calc Mass | Abs Diff (pp) | Score | Mass Match | Abund Match | Spacing Match | DBE |
| <input checked="" type="checkbox"/> | C <sub>3</sub> H <sub>9</sub> N <sub>3</sub> O <sub>2</sub> | C <sub>3</sub> H <sub>10</sub> N <sub>3</sub> O <sub>2</sub>  | 120.07692 | 120.07675 | 119.06965 | 119.06948 | 1.42          | 99.2  | 99.6       | 98.45       | 99.28         | 1   |
| m/z                                 | Ion                                                         | Formula                                                       | Abundance |           |           |           |               |       |            |             |               |     |
| 142.05889                           | (M+Na) <sup>+</sup>                                         | C <sub>3</sub> H <sub>9</sub> N <sub>3</sub> NaO <sub>2</sub> | 2241.5    |           |           |           |               |       |            |             |               |     |
| Best                                | Formula (M)                                                 | Ion Formula                                                   | m/z       | Calc m/z  | Mass      | Calc Mass | Abs Diff (pp) | Score | Mass Match | Abund Match | Spacing Match | DBE |
| <input checked="" type="checkbox"/> | C <sub>3</sub> H <sub>9</sub> N <sub>3</sub> O <sub>2</sub> | C <sub>3</sub> H <sub>9</sub> N <sub>3</sub> NaO <sub>2</sub> | 142.05889 | 142.0587  | 119.06967 | 119.06948 | 1.63          | 47.39 | 99.52      | 0           | 0             | 1   |

**Figure S5.** Molecular formula calculations from the [M+H]<sup>+</sup> ion in peak 1 and both the [M+H]<sup>+</sup> and [M+Na]<sup>+</sup> ions in peak 2 of Figure S13. These calculations confirm that both peaks in the chromatograms of **13** have the same molecular formula, C<sub>3</sub>H<sub>9</sub>N<sub>3</sub>O<sub>2</sub>.

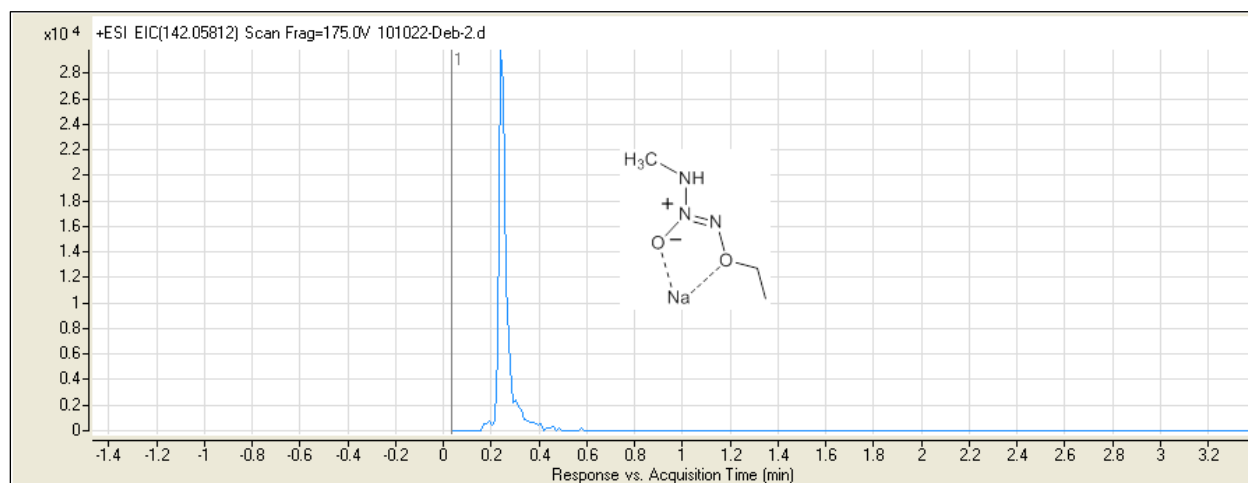

**Figure S6.** Extracted ion chromatogram of the ion of  $m/z$  142.058 in the spectrum of **13**, which is the [M+Na]<sup>+</sup> ion detected in peak 2. This analysis shows that only peak 2 formed detectable sodium adducts.

**Single-crystal X-ray Diffraction Analysis of Z-4.** Single-crystal X-ray diffraction data on **Z-4** were collected at 100 K using MoK $\alpha$  radiation ( $\lambda = 0.71073 \text{ \AA}$ ) and a CCD area detector. The sample was prepared for data collection by coating with high viscosity microscope oil. The oil-coated crystal was mounted on a MicroMesh mount and transferred immediately to the diffractometer. The  $0.618 \times 0.514 \times 0.277 \text{ mm}^3$  crystal was monoclinic in space group  $P2_{1/c}$  with unit cell dimensions  $a = 22.122(4) \text{ \AA}$ ,  $b = 5.3670(10) \text{ \AA}$ ,  $c = 16.713(3) \text{ \AA}$ , and  $\beta = 112.172(4)^\circ$ . Corrections were applied for Lorentz, polarization, and absorption effects. The structure was solved by direct methods and refined by full-matrix least squares on  $F^2$  values. using appropriate programs. Parameters refined included atomic coordinates and anisotropic thermal parameters for all non-hydrogen atoms. Hydrogen atoms on carbons were included using a riding model [coordinate shifts of C applied to H atoms] with C-H distance set at  $0.96 \text{ \AA}$ . The asymmetric unit contained a single molecule. Data were 96.3% complete to  $25.00^\circ \theta$ . The asymmetric unit contains two molecules.

**Table S1.** Crystal data and structure refinement for **Z-4**.

|                        |                                               |                            |
|------------------------|-----------------------------------------------|----------------------------|
| Empirical formula      | $\text{C}_8\text{H}_{11}\text{N}_3\text{O}_2$ |                            |
| Formula weight         | 181.20                                        |                            |
| Temperature            | 100(2) K                                      |                            |
| Wavelength             | $0.71073 \text{ \AA}$                         |                            |
| Crystal system         | Monoclinic                                    |                            |
| Space group            | $P 2_{1/c}$                                   |                            |
| Unit cell dimensions   | $a = 22.122(4) \text{ \AA}$                   | $\alpha = 90^\circ$        |
|                        | $b = 5.3670(10) \text{ \AA}$                  | $\beta = 112.172(4)^\circ$ |
|                        | $c = 16.713(3) \text{ \AA}$                   | $\gamma = 90^\circ$        |
| Volume                 | $1837.6(6) \text{ \AA}^3$                     |                            |
| Z                      | 8                                             |                            |
| Density (calculated)   | $1.310 \text{ Mg/m}^3$                        |                            |
| Absorption coefficient | $0.097 \text{ mm}^{-1}$                       |                            |
| F(000)                 | 768                                           |                            |

|                                        |                                                                      |
|----------------------------------------|----------------------------------------------------------------------|
| Crystal size                           | 0.618 x 0.514 x 0.277 mm <sup>3</sup>                                |
| $\theta$ range for data collection     | 8.18 to 25.35°                                                       |
| Index ranges                           | -26 $\leq$ h $\leq$ 26, -6 $\leq$ k $\leq$ 6, -20 $\leq$ l $\leq$ 20 |
| Reflections collected                  | 19649                                                                |
| Independent reflections                | 3249 [R(int) = 0.0574]                                               |
| Completeness to $\theta = 25.00^\circ$ | 96.3 %                                                               |
| Absorption correction                  | Semi-empirical from equivalents                                      |
| Max. and min. transmission             | 0.9736 and 0.9425                                                    |
| Refinement method                      | Full-matrix least-squares on F <sup>2</sup>                          |
| Data / restraints / parameters         | 3249 / 156 / 237                                                     |
| Goodness-of-fit on F <sup>2</sup>      | 1.083                                                                |
| Final R indices [I $>$ 2 $\sigma$ (I)] | R1 = 0.0451, wR2 = 0.1089                                            |
| R indices (all data)                   | R1 = 0.0527, wR2 = 0.1105                                            |
| Largest diff. peak and hole            | 0.423 and -0.440 e. $\text{\AA}^{-3}$                                |

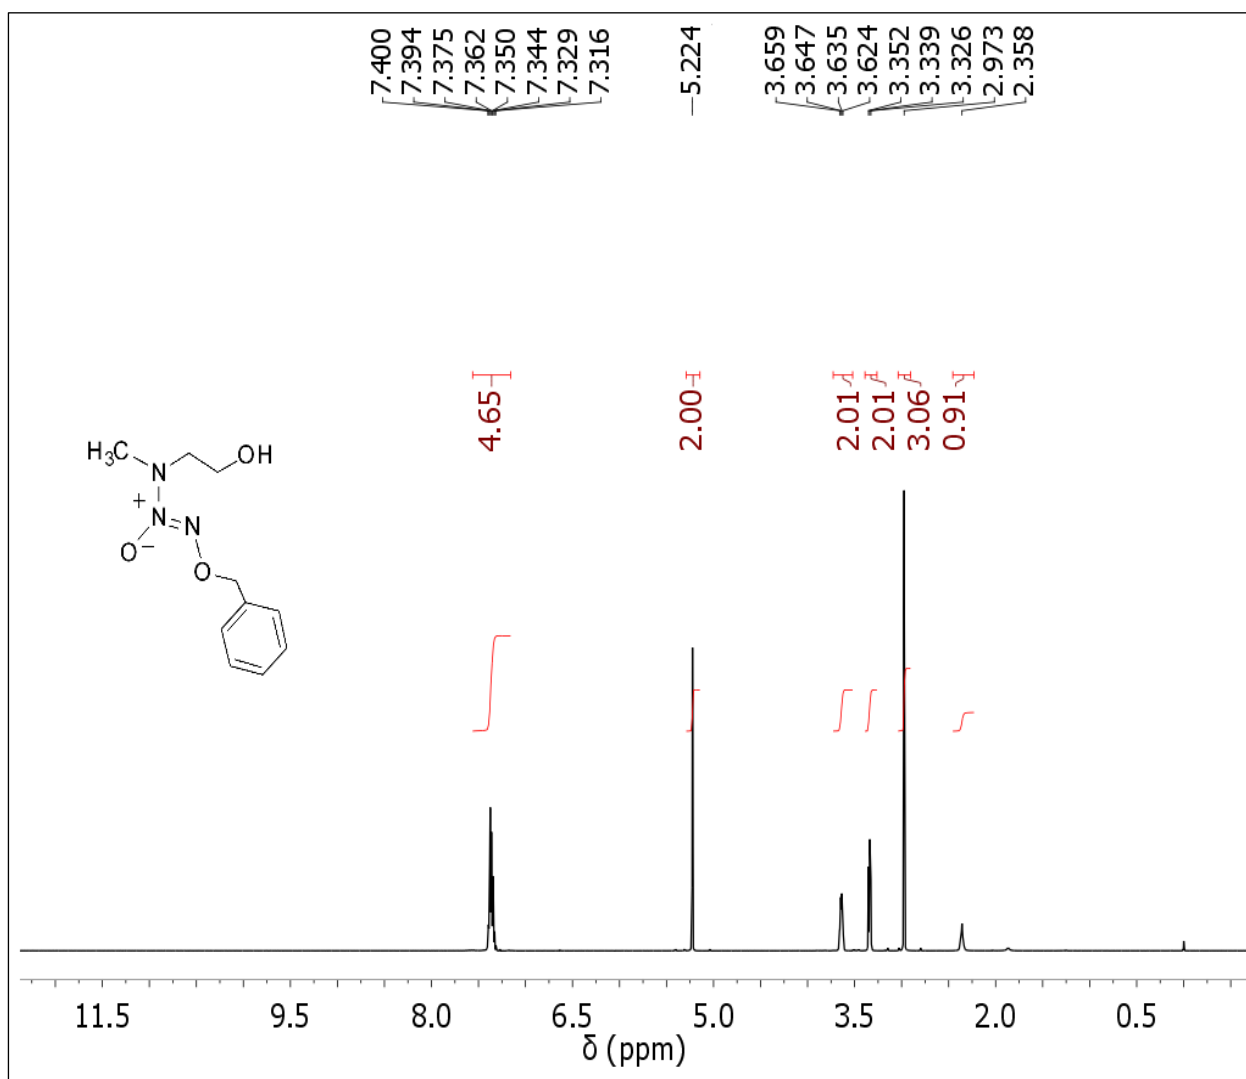

**Figure S7.** <sup>1</sup>H NMR spectra of compound **7** in CDCl<sub>3</sub> at 25 °C.



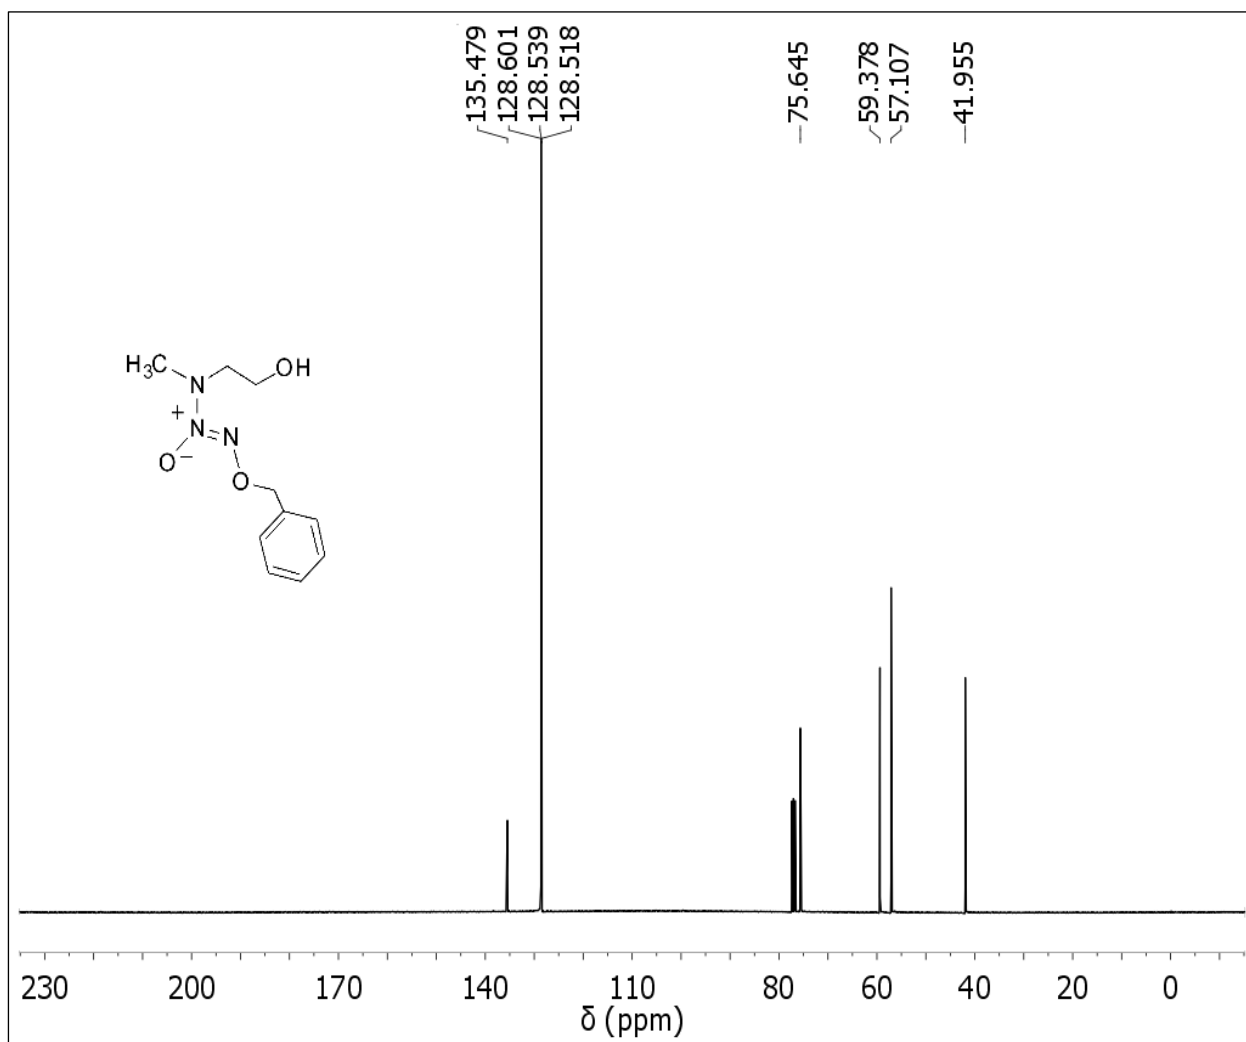

**Figure S8.** <sup>13</sup>C NMR spectra of compound 7 in CDCl<sub>3</sub> at 25 °C.

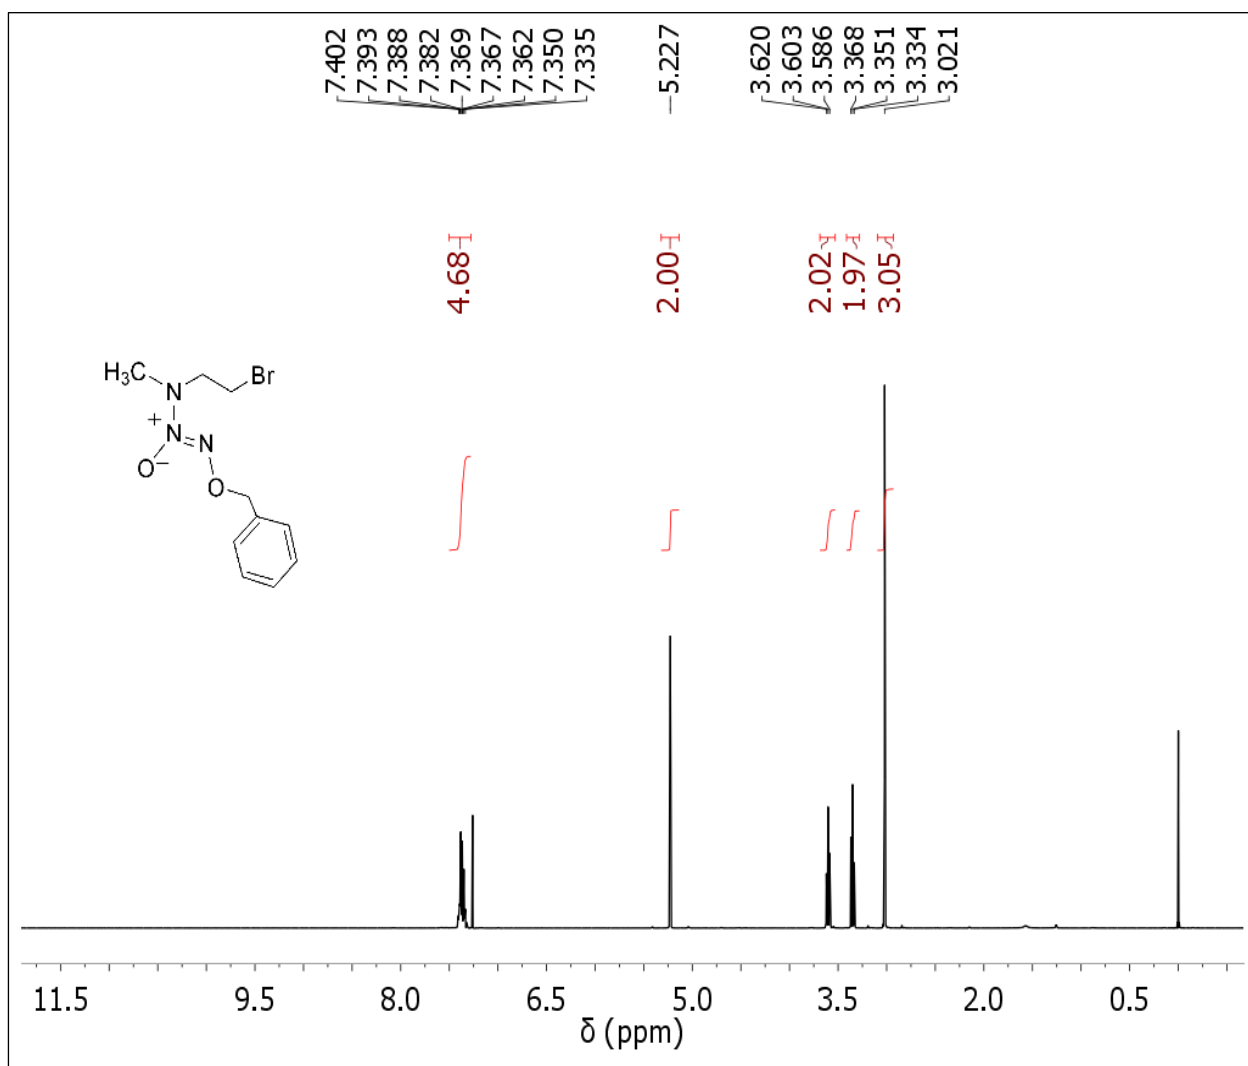

**Figure S9.** <sup>1</sup>H NMR spectra of compound **8** in CDCl<sub>3</sub> at 25 °C.

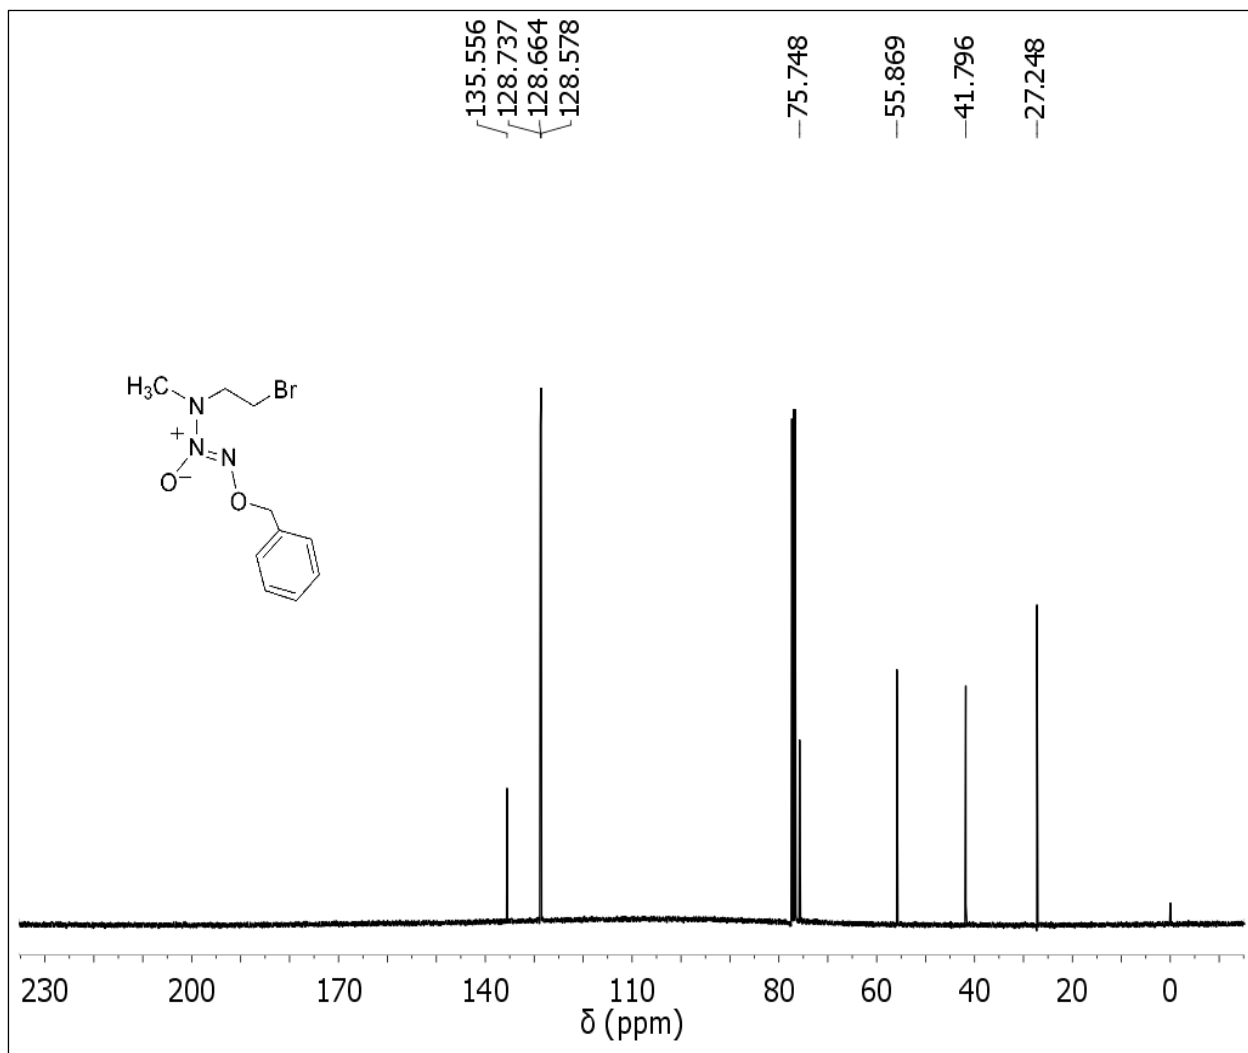

**Figure S10.** <sup>13</sup>C NMR spectra of compound **8** in CDCl<sub>3</sub> at 25 °C.

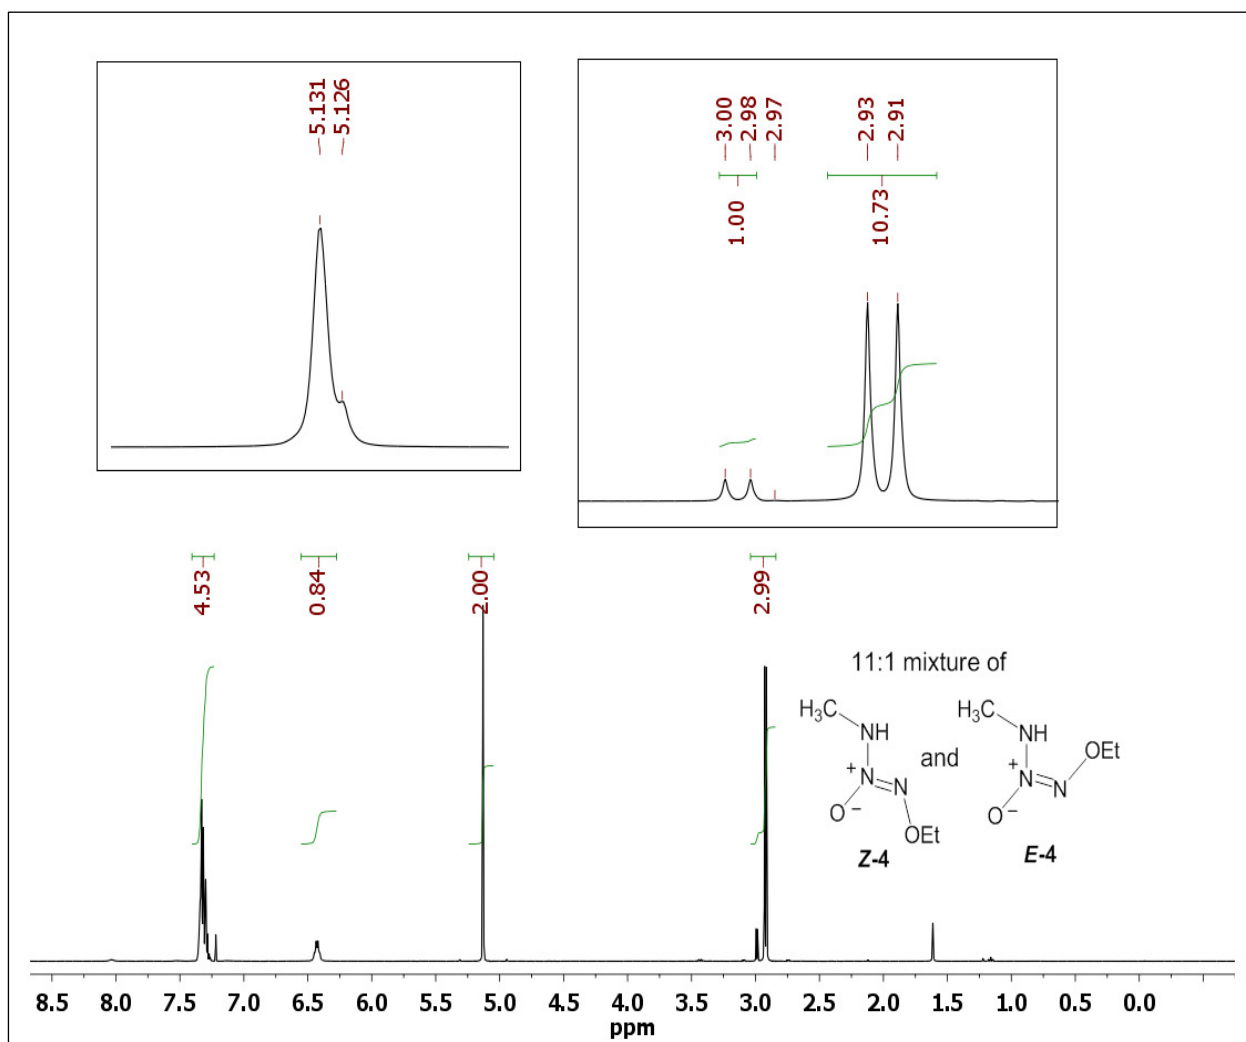

**Figure S11.**  $^1\text{H}$  NMR spectrum of an equilibrium mixture of compounds **Z-4** and **E-4** in  $\text{CDCl}_3$  at  $25\text{ }^\circ\text{C}$ .

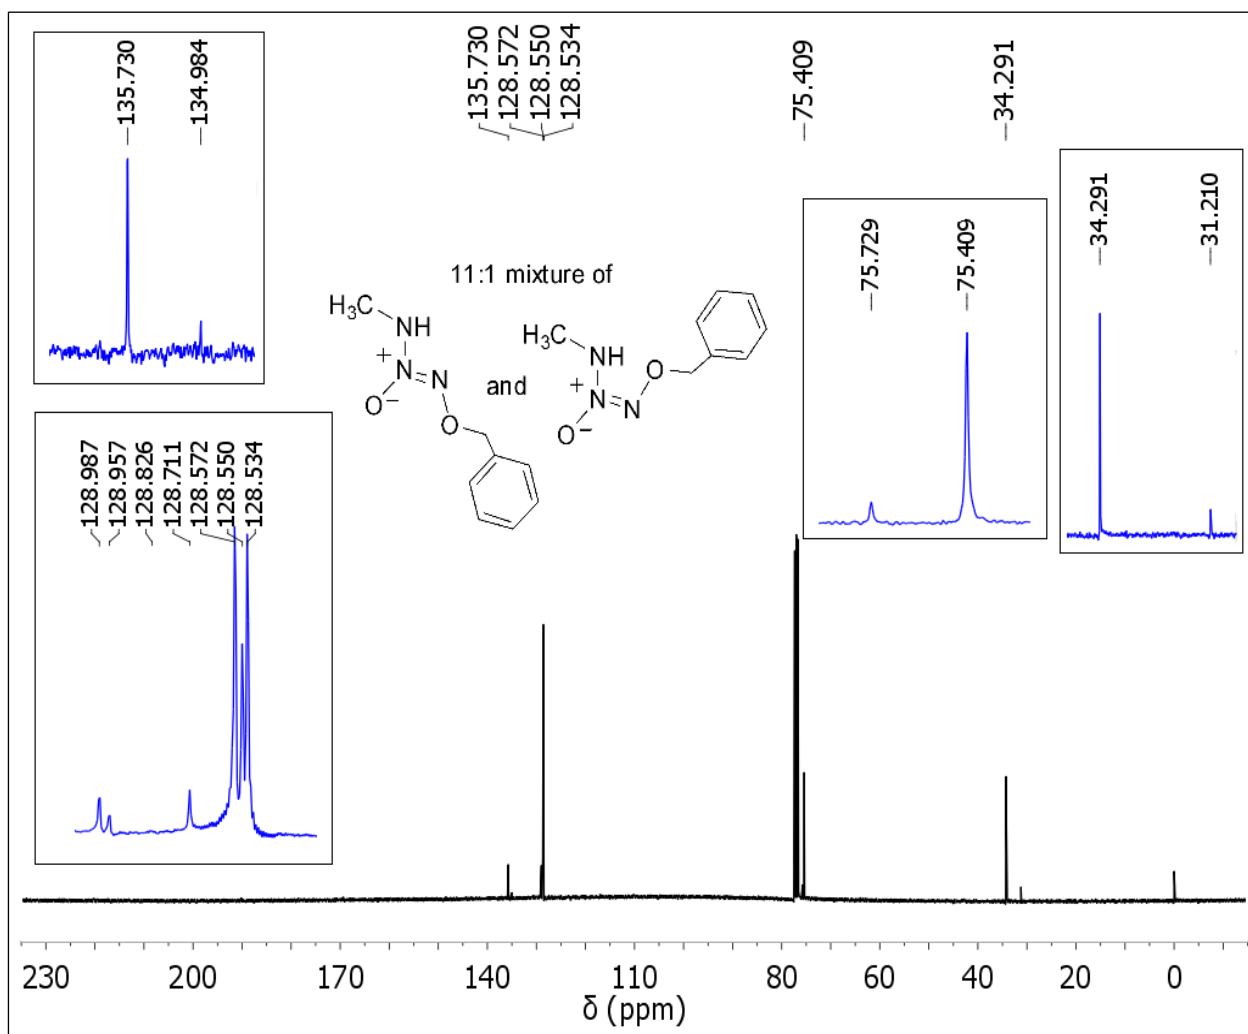

**Figure S12.**  $^{13}\text{C}$  NMR spectrum of an equilibrium mixture of compounds **Z-4** and **E-4** in  $\text{CDCl}_3$  at  $25\text{ }^\circ\text{C}$ .

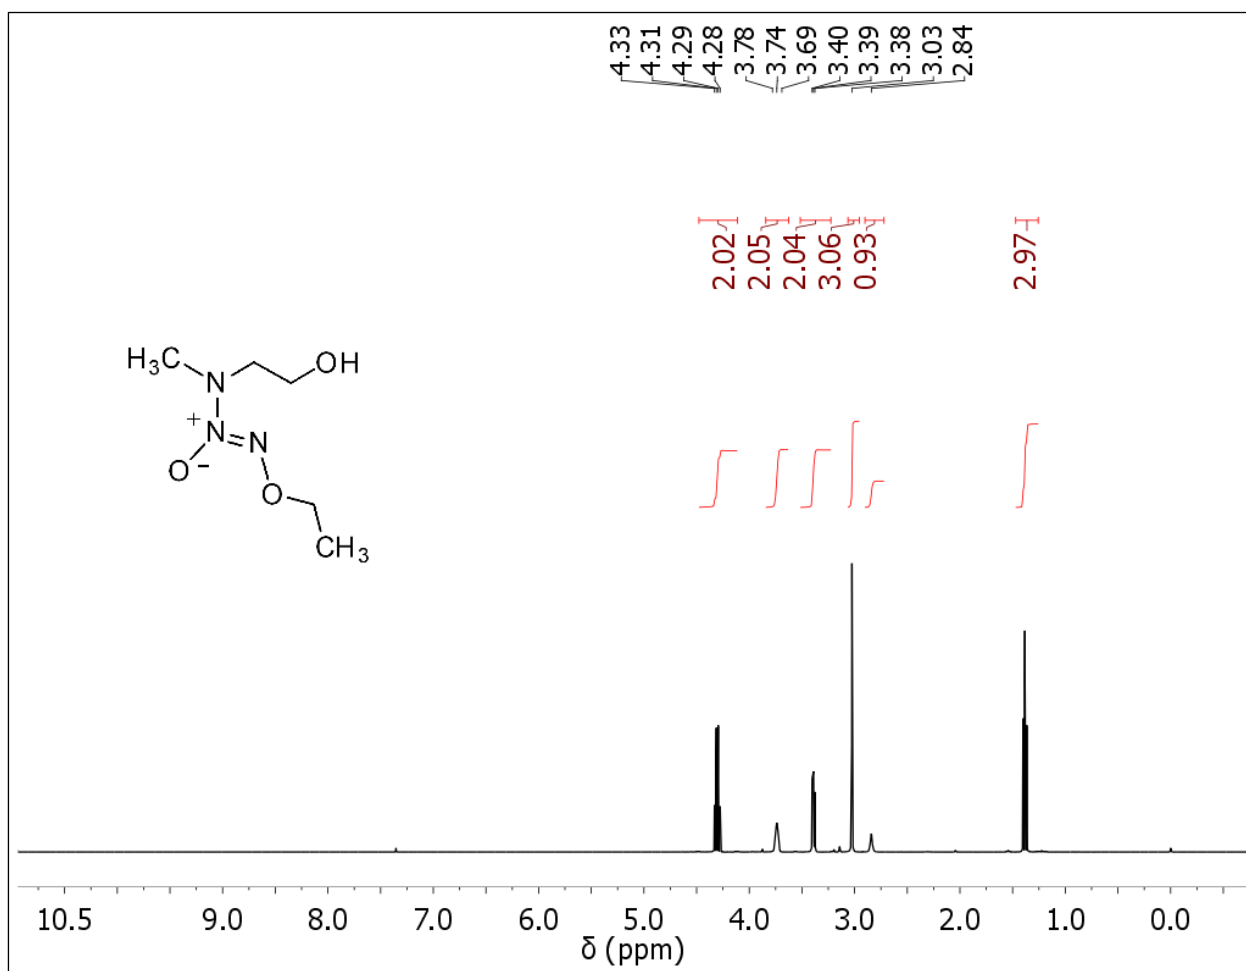

**Figure S13.** <sup>1</sup>H NMR spectrum of compound **10** in CDCl<sub>3</sub> at 25 °C.

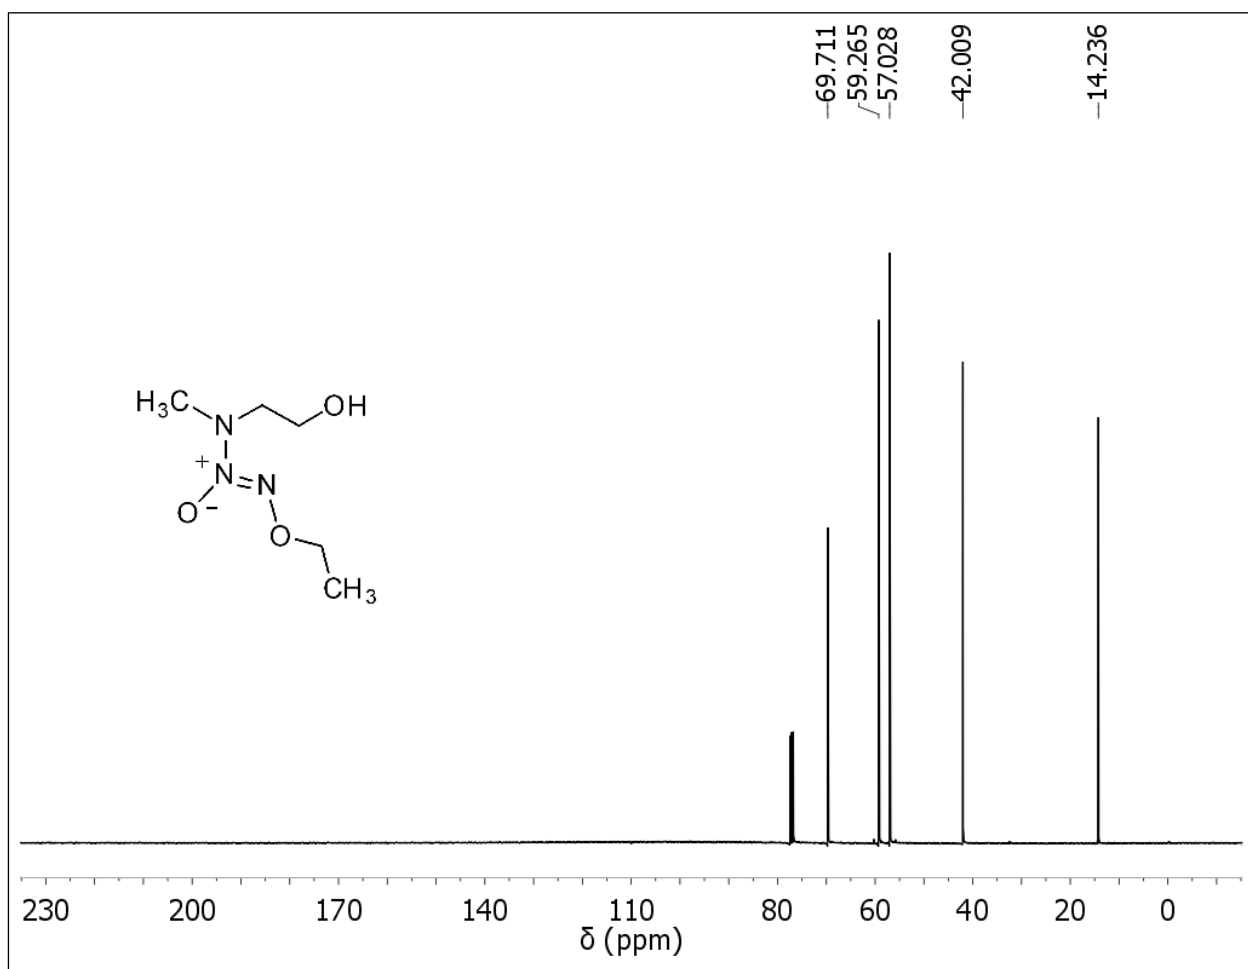

**Figure S13.** <sup>13</sup>C NMR spectrum of compound **10** in CDCl<sub>3</sub> at 25 °C.

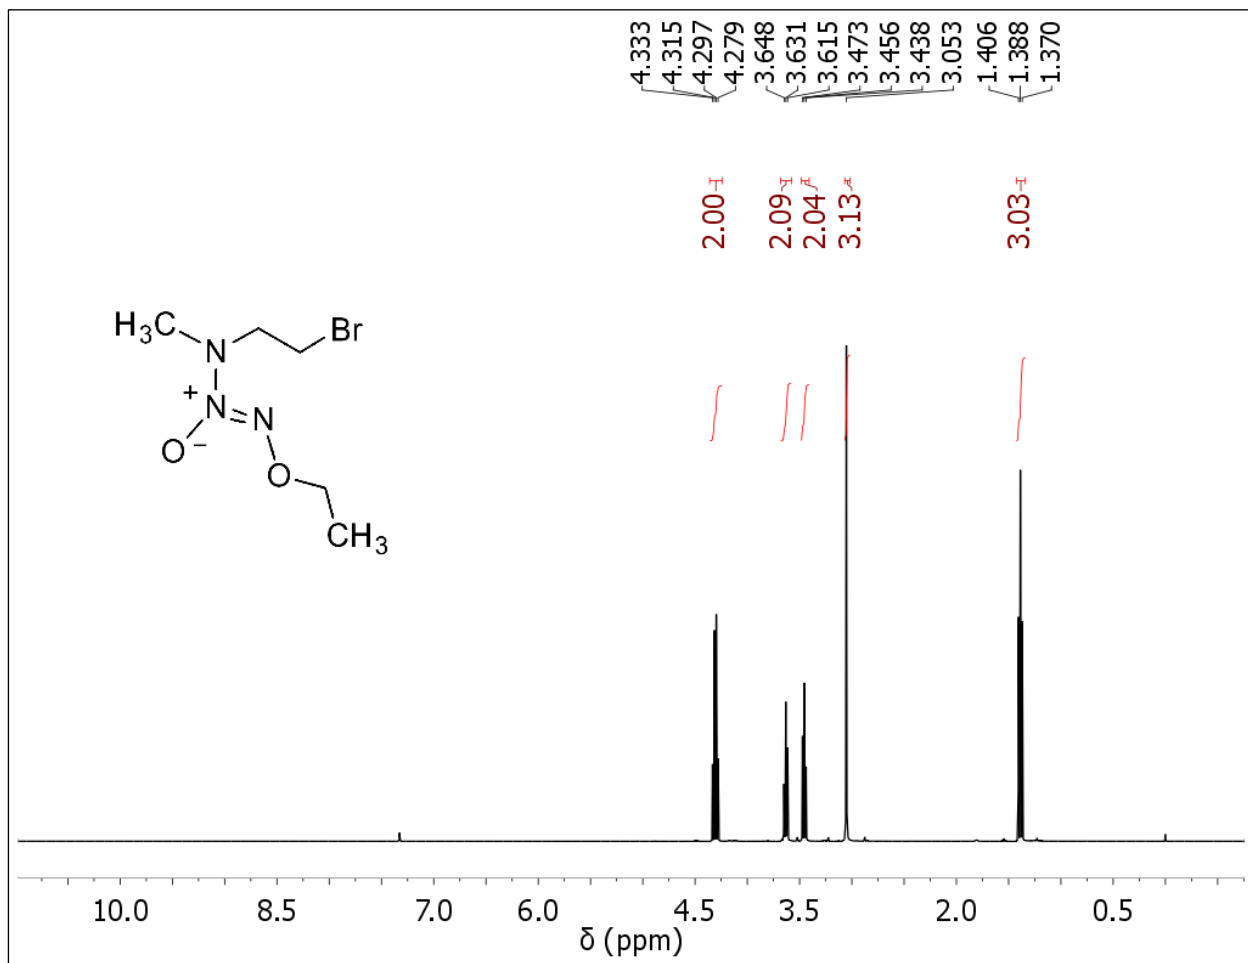

**Figure S15.** <sup>1</sup>H NMR spectrum of compound **11** in CDCl<sub>3</sub> at 25 °C.



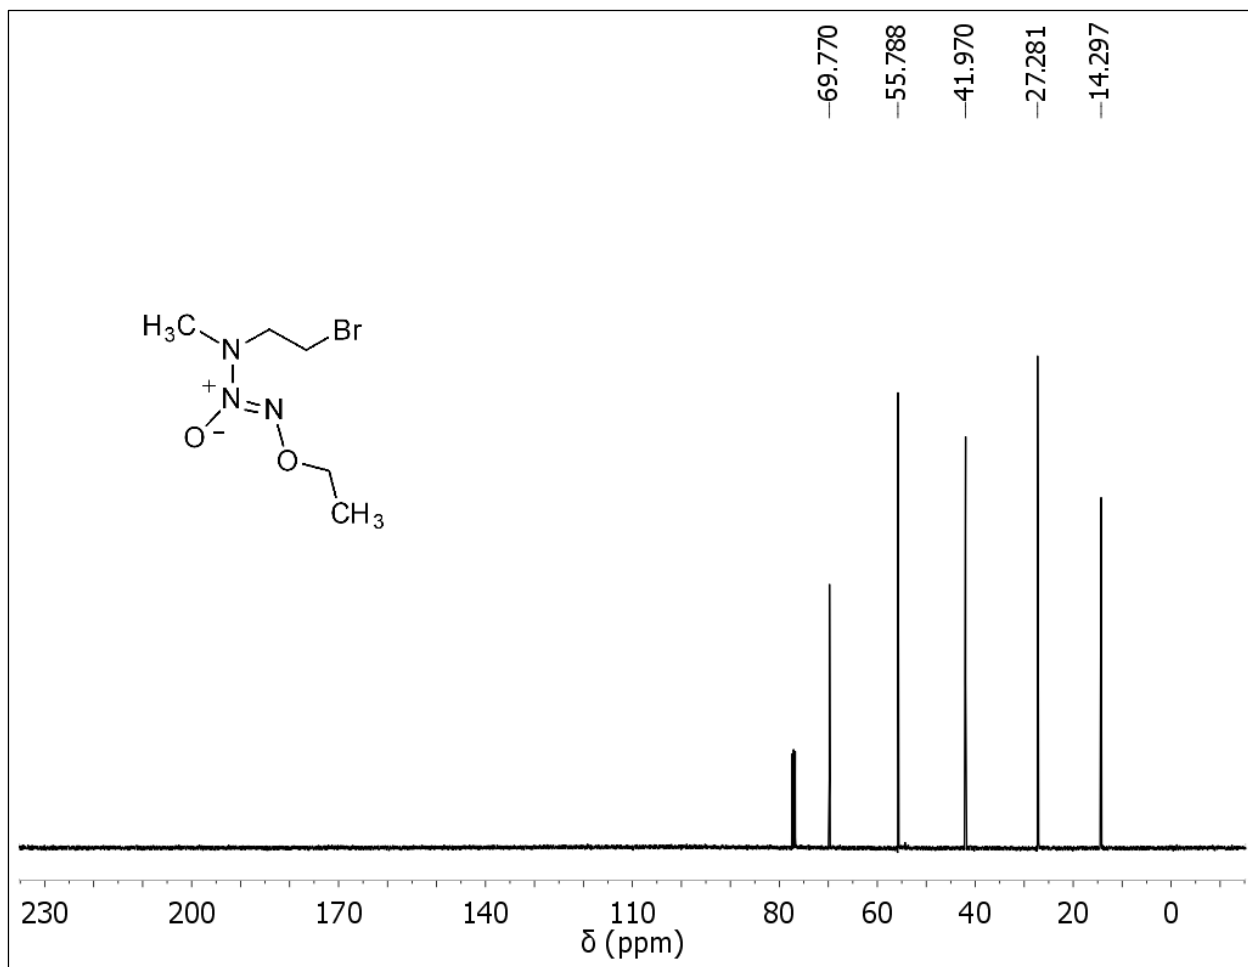

**Figure S16.**  $^{13}\text{C}$  NMR spectrum of compound **11** in  $\text{CDCl}_3$  at  $25\text{ }^\circ\text{C}$ .

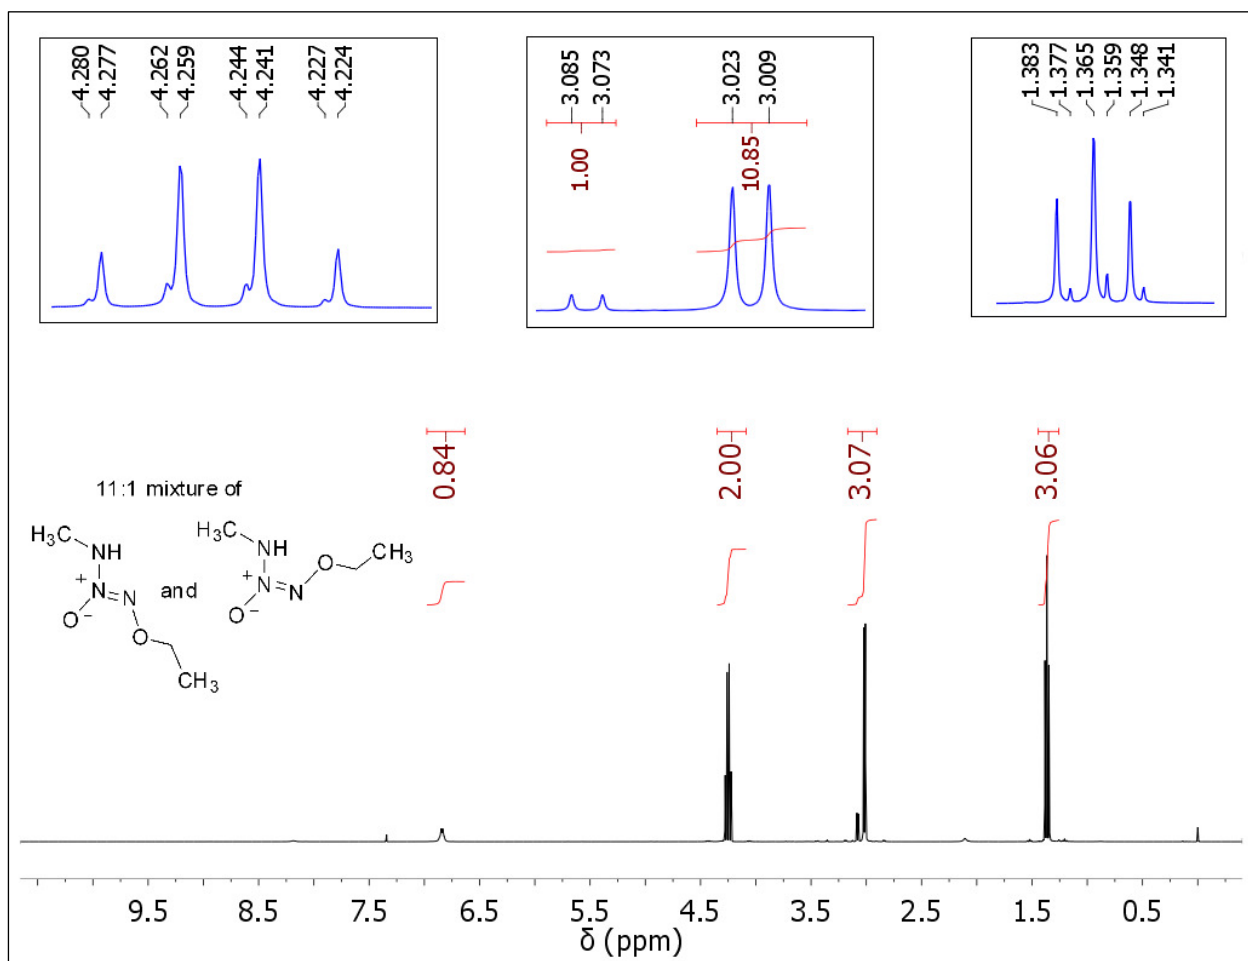

**Figure S17.**  $^1\text{H}$  NMR spectrum of an equilibrium mixture of compounds **Z-13** and **E-13** in  $\text{CDCl}_3$  at 25  $^\circ\text{C}$ .

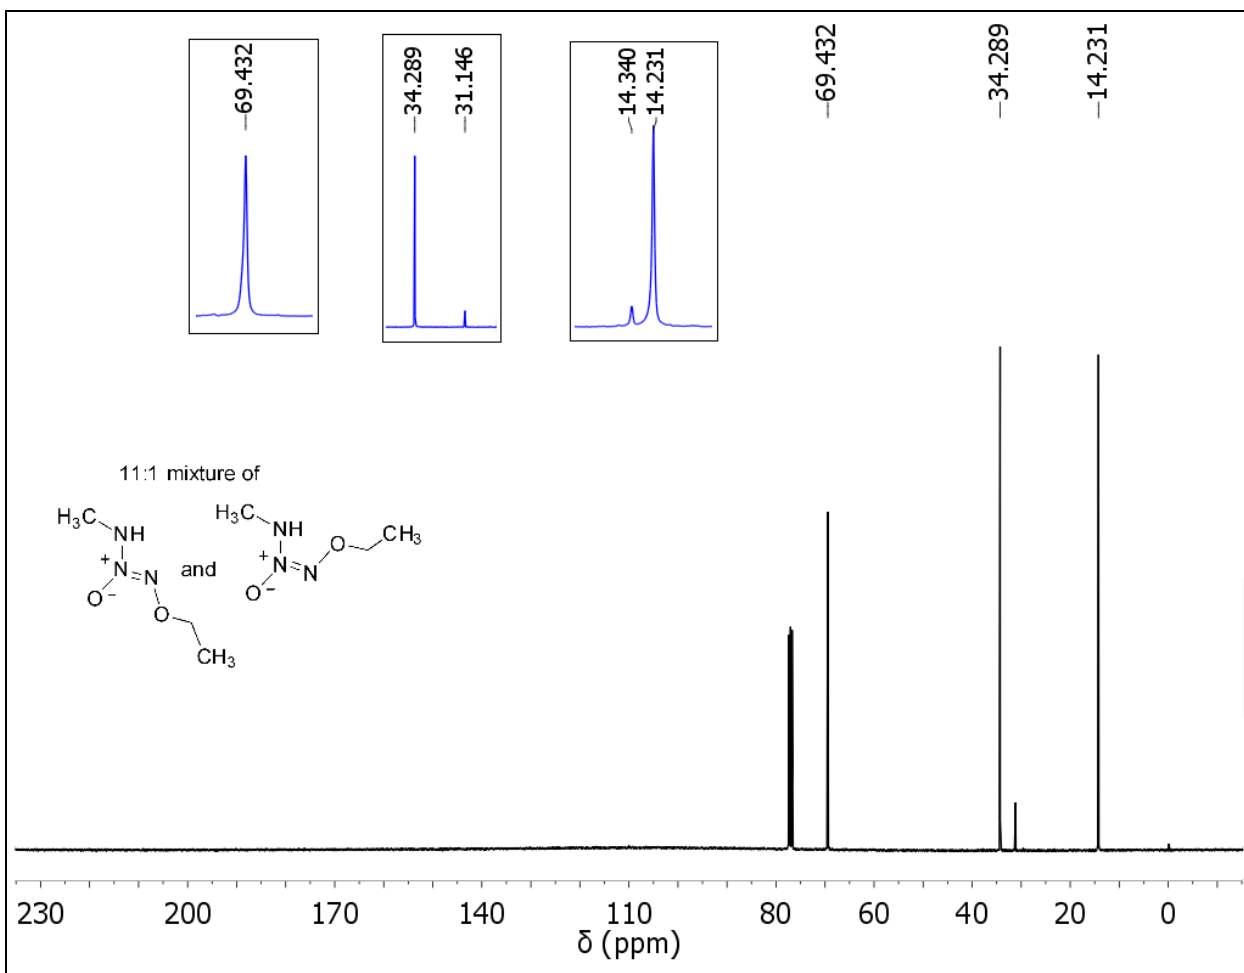

**Figure S18.**  $^{13}\text{C}$  NMR spectrum of an equilibrium mixture of compounds **Z-13** and **E-13** in  $\text{CDCl}_3$  at 25 °C.

## References

- [1] J. A. Hrabie, J. R. Klose, D. A. Wink, L. K. Keefer, *J. Org. Chem.* **1993**, *58*, 1472-1478.
- [2] L. K. Keefer, R. W. Nims, K. M. Davies, D. A. Wink, *Methods Enzymol.* **1996**, *268*, 281.
- [3] C. A. Velázquez, Q. Chen, M. L. Citro, L. K. Keefer, E. E. Knaus, *J. Med. Chem.* **2008**, *51*, 1954-1961.
